# Supplementary material for: Erector Spinae Plane Block versus Paravertebral Block after Thoracic Surgery for Lung Cancer: A Propensity Score Study
Source: MDPI journal article supplement (doi:10.3390/cancers15082306), 2023-04-14
Supplement: s1 [file s1]

**Supplementary Table S2. Patients' intraoperative characteristics.**

|                                                | Global<br>population<br>(n=107) (%) | ESPB group<br>(n=54) (%) | BPV group<br>(n=53) (%) | p-value |
|------------------------------------------------|-------------------------------------|--------------------------|-------------------------|---------|
| <b>Surgery</b>                                 |                                     |                          |                         |         |
| Lobectomy                                      | 77 (72%)                            | 36 (67%)                 | 41 (77%)                | 0.22    |
| Segmentectomy                                  | 30 (28%)                            | 18 (33%)                 | 12 (23%)                | 0.22    |
| VATS                                           | 50 (47%)                            | 27 (50%)                 | 23 (43%)                | 0.49    |
| RATS                                           | 57 (53%)                            | 27 (50%)                 | 30 (57%)                | 0.49    |
| Surgery duration (min)                         | 141.90 ±41.98                       | 134.60 ±43.50            | 149.20 ±39.43           | 0.07    |
| <b>Anesthesia and analgesia during surgery</b> |                                     |                          |                         |         |
| Total dose of ketamine (mg)                    | 46 [35-50]                          | 40 [30-50]               | 50 [40-50]              | 0.26    |
| Total dose of remifentanil (µg)                | 768 [628-1150]                      | 752 [598-946]            | 851 [641-1240]          | 0.07    |
| Intraoperative morphine (mg)                   | 10 [8-10]                           | 10 [8-10]                | 9 [8-10]                | 0.15    |
| Intraoperative dexamethasone                   | 103 (96)                            | 51 (94)                  | 52 (98)                 | 0.62    |
| Intraoperative paracetamol                     | 107 (100)                           | 54 (100)                 | 53 (100)                | 0.99    |
| Intraoperative nefopam                         | 102 (95)                            | 53 (98)                  | 59 (92)                 | 0.2     |
| Intraoperative ketoprofen                      | 90 (84)                             | 46 (85)                  | 44 (83)                 | 0.76    |

Data for normal distribution are expressed as mean ± SD. For non-normal distribution, data are expressed as median [25-75<sup>th</sup> percentile]. For qualitative parameters, data are presented as n (% of patients).

Abbreviations: VATS, Video-assisted thoracoscopy; RATS, Robot-assisted thoracoscopy.
