# Supplementary material for: Erector Spinae Plane Block versus Paravertebral Block after Thoracic Surgery for Lung Cancer: A Propensity Score Study
Source: MDPI journal article supplement (doi:10.3390/cancers15082306), 2023-04-14
Supplement: s1 [file s1]

Supplementary Table S3. Advantages and inconveniences of the PVB and ESPB.

|                                          | Advantages                                                                                                                                                                                                                                                                                                                                                                                                                                                                | Inconveniences                                                                                                                                                                                                                                                                                                                        |
|------------------------------------------|---------------------------------------------------------------------------------------------------------------------------------------------------------------------------------------------------------------------------------------------------------------------------------------------------------------------------------------------------------------------------------------------------------------------------------------------------------------------------|---------------------------------------------------------------------------------------------------------------------------------------------------------------------------------------------------------------------------------------------------------------------------------------------------------------------------------------|
| <b>Paravertebral block (PVB)</b>         | <ul style="list-style-type: none"> <li>- Important bibliography reporting similar efficacy between continuous PVB and thoracic epidural analgesia (EA) for postoperative pain and morphine consumption after videothoracoscopy</li> <li>- Fewer side effects than thoracic EA (hypotension, nausea)</li> <li>- Possible continuous analgesia with catheter</li> <li>- Ipsilateral to surgery</li> <li>- Can be performed on a patient under general anesthesia</li> </ul> | <ul style="list-style-type: none"> <li>- Frequent complications (pneumothorax, intravascular injections, intrathecal injections).</li> <li>- Contraindication under curative anticoagulation (risk of spinal epidural hematoma)</li> <li>- Challenging block requiring expertise and experience in locoregional anesthesia</li> </ul> |
| <b>Erector spinae plane block (ESPB)</b> | <ul style="list-style-type: none"> <li>- Superficial compared to PVB: infrequent complications (space away from the pleura, large vessels, and the epidural and intrathecal space)</li> <li>- Interesting block for analgesia in ambulatory surgery and locoregional anesthesia for chronic pain</li> <li>- Block can be performed under curative anticoagulation</li> <li>- Possible continuous analgesia with catheter</li> <li>- Ipsilateral to surgery</li> </ul>     | <ul style="list-style-type: none"> <li>- There is a lack of evidence for this block for routine use, but recent studies suggest a similar efficacy to PVB regarding postoperative pain and morphine consumption</li> </ul>                                                                                                            |

- 
- Can be performed on a patient under general anesthesia
- 

Abbreviations; EA, epidural analgesia; ESPB, erector spinae plane block; PVB, Paravertebral block.
