# Supplementary material for: Erector Spinae Plane Block versus Paravertebral Block after Thoracic Surgery for Lung Cancer: A Propensity Score Study
Source: MDPI journal article supplement (doi:10.3390/cancers15082306), 2023-04-14
Supplement: s1 [file s1]

**Table S1. Baseline characteristics.**

|                                               | Global<br>population<br>(n=107) (%) | ESPB group<br>(n=54) (%) | BPV group<br>(n=53) (%) | p-value |
|-----------------------------------------------|-------------------------------------|--------------------------|-------------------------|---------|
| <b>Demographic characteristics</b>            |                                     |                          |                         |         |
| Age (yr, range)                               | 65 [59-70]                          | 66 [60-71]               | 63 [57-69]              | 0.08    |
| Sex                                           |                                     |                          |                         |         |
| Male                                          | 66 (62)                             | 36 (67)                  | 30 (57)                 | 0.28    |
| Female                                        | 41 (38)                             | 18 (33)                  | 23 (43)                 | 0.28    |
| ASA 1                                         | 11 (10)                             | 3 (6)                    | 8 (15)                  | 0.12    |
| ASA 2                                         | 82 (77)                             | 41 (76)                  | 41 (77)                 | 0.86    |
| ASA 3                                         | 14 (13)                             | 10 (18)                  | 4 (8)                   | 0.15    |
| Body mass index (kg/m <sup>2</sup> )          | 26.05 ±4.82                         | 26.89 ±5.26              | 25.19 ±4.21             | 0.06    |
| <b>Comorbidities</b>                          |                                     |                          |                         |         |
| Chronic analgesic consumption                 | 8 (7)                               | 3 (6)                    | 5 (9)                   | 0.48    |
| Neoadjuvant chemotherapy                      | 5 (5)                               | 3 (6)                    | 2 (4)                   | 0.90    |
| COPD                                          | 28 (26)                             | 18 (33)                  | 10 (19)                 | 0.08    |
| Diabetes                                      | 11 (10)                             | 7 (13)                   | 4 (8)                   | 0.53    |
| Arterial hypertension                         | 40 (37)                             | 22 (41)                  | 18 (34)                 | 0.47    |
| Cardiac insufficiency                         | 6 (6)                               | 4 (7)                    | 2 (4)                   | 0.68    |
| Renal insufficiency<br>(clearance <30 mL/min) | 9 (8)                               | 6 (11)                   | 3 (5)                   | 0.49    |
| Hepatic Insufficiency                         | 0 (0)                               | 0 (0)                    | 0 (0)                   | NA      |
| Coronary artery disease                       | 9 (8)                               | 5 (9)                    | 4 (8)                   | 0.99    |

Data for normal distribution are expressed as mean ± SD. For non-normal distribution, data are expressed as median [25-75<sup>th</sup> percentile]. For qualitative parameters, data are presented as n (% of patients).

**Abbreviations:** ASA, American Society of Anaesthesiologists; COPD, Chronic obstructive pulmonary disease; ESPB group, Erector spinae plane block group; PVB group, Paravertebral block group.

NA, statistical tests are not applicable due to the number of patients.
