# Supplementary material for: Erector Spinae Plane Block versus Paravertebral Block after Thoracic Surgery for Lung Cancer: A Propensity Score Study
Source: Cancers (Basel). 2023 Apr 14;15(8):2306. doi: 10.3390/cancers15082306 (PMC10137003; doi:10.3390/cancers15082306)
Supplement: Supplementary file 1 [file cancers-15-02306-s001.zip]

Archive with 4 entries (4 files):
- Supplementary File S1.pdf
- Supplementary Table S1.pdf
- Supplementary Table S2.pdf
- Supplementary Table S3.pdf
